# Supplementary material for: Understanding the formation and evolution of interdiffusion grown organolead halide perovskite thin films by thermal annealing
Source: Royal Society of Chemistry journal article supplement (doi:10.1039/c4ta04007d), 2014-09-12
Supplement: c4ta04007d1.pdf [file c4ta04007d1.pdf]

## Supplementary Information

### Understanding the Formation and Evolution of Interdiffusion Grown Organolead Halide Perovskite Thin Films by Thermal Annealing

Cheng Bi,<sup>a</sup> Yuchuan Shao,<sup>a</sup> Yongbo Yuan,<sup>a</sup> Zhengguo Xiao,<sup>a</sup> Chenggong Wang,<sup>b</sup> Yongli Gao,<sup>b</sup> and Jinsong Huang<sup>\*a</sup>

<sup>a</sup>Department of Mechanical and Materials Engineering and Nebraska Center for Materials and Nanoscience, University of Nebraska-Lincoln, Lincoln, Nebraska 68588-0656, USA

<sup>b</sup>Department of Physics and Astronomy, University of Rochester, Rochester, NY 14627, USA

\*To whom correspondence should be addressed-mail: [jhuang2@unl.edu](mailto:jhuang2@unl.edu)

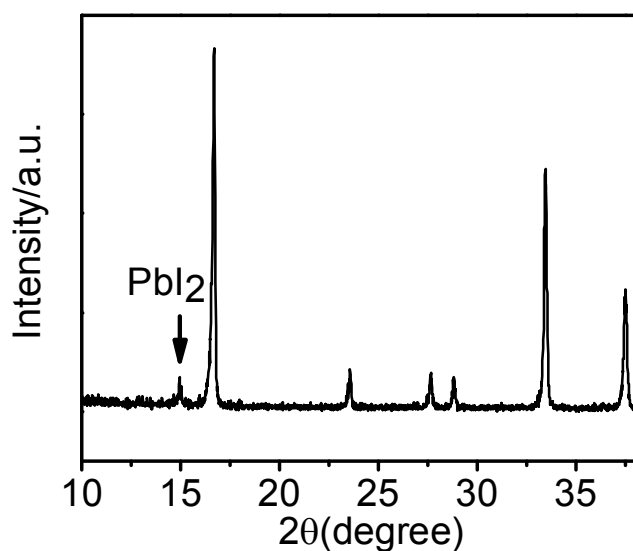

**Figure S1**, XRD pattern of MAPbI<sub>3</sub> films annealed at 150 °C for 10 min. PbI<sub>2</sub> peak appearing indicates the decomposition.
